## Novel therapeutic concepts

# Biomarkers in atrial fibrillation: a clinical review

Ziad Hijazi<sup>1,2\*</sup>, Jonas Oldgren<sup>1,2</sup>, Agneta Siegbahn<sup>1,3</sup>, Christopher B. Granger<sup>4</sup>  
and Lars Wallentin<sup>1</sup>

<sup>1</sup>Uppsala Clinical Research Center (UCR), Uppsala University, Uppsala Science Park, SE-752 37, Uppsala, Sweden; <sup>2</sup>Department of Medical Sciences, Cardiology, Uppsala University, Uppsala, Sweden; <sup>3</sup>Department of Medical Sciences, Clinical Chemistry, Uppsala University, Uppsala, Sweden; and <sup>4</sup>The Duke Clinical Research Institute, Duke University Medical Center, Durham, NC, USA

Received 6 November 2012; revised 13 December 2012; accepted 10 January 2013; online publish-ahead-of-print 5 February 2013

Assessment of atrial fibrillation (AF)-associated stroke risk is at present mainly based on clinical risk scores such as CHADS<sub>2</sub> and CHA<sub>2</sub>DS<sub>2</sub>-VASc, although these scores provide only modest discrimination of risk for individual patients. Biomarkers derived from the blood may help refine risk assessment in AF for stroke outcomes and for mortality. Recent studies of biomarkers in AF have shown that they can substantially improve risk stratification. Cardiac biomarkers, such as troponin and natriuretic peptides, significantly improve risk stratification in addition to current clinical risk stratification models. Similar findings have recently been described for markers of renal function, coagulation, and inflammation in AF populations based on large randomized prospective clinical trials or large community-based cohorts. These new findings may enable development of novel tools to improve clinical risk assessment in AF. Biomarkers in AF may also improve the understanding of the pathophysiology of AF further as well as potentially elucidate novel treatment targets. This review will highlight novel associations of biomarkers and outcomes in AF as well as recent progress in the use of biomarkers for risk stratification.

### Keywords

Biomarkers • Atrial fibrillation • Stroke risk • Troponin • BNP • GFR • cystatin C • D-dimer • CRP • IL-6  
• Review • Risk stratification • Coagulation • Inflammation

## Introduction

Atrial fibrillation (AF) is the most common sustained arrhythmia and confers an independent increased risk of stroke and death.<sup>1,2</sup> The prevalence of AF increases with age, is doubled for every decade after the age of 50 years, and reaches ~10% in persons ≥80 years. Furthermore, it is projected to increase in the coming decades.<sup>3,4</sup> Although the exact mechanisms behind AF are not completely elucidated, the underlying pathophysiological changes have been well described. For the most common type of atrial fibrillation related to aging, the process involves a structural remodelling in which connective tissue deposition and fibrosis are the hallmarks, as well as altered atrial electrophysiological properties facilitating the initiation and perpetuation of AF.<sup>5,6</sup> In addition, left ventricular dysfunction and elevated ventricular filling pressures contribute to atrial remodelling and may produce a substrate and a trigger for AF as well.<sup>7,8</sup> Moreover, the significant role of the pulmonary veins as one of the key trigger sites for the onset of AF has also been well described.<sup>9</sup> Despite clinical differences in presentation, duration, and AF type, the corner stone of the management of patients focuses on

relief of symptoms and prevention of AF-associated stroke. Several clinical and echocardiographic risk factors have been identified that predict risk of stroke in AF. Systematic reviews have identified prior stroke/transient ischaemic attack/thromboembolism, older age, hypertension, diabetes, and structural heart disease as important risk factors.<sup>10,11</sup> Recently, vascular disease, age ≥65 years, and female gender were also added and now constitute the variables in the widely used CHA<sub>2</sub>DS<sub>2</sub>-VASc score [which assigns 1 point each to a history of congestive heart failure, hypertension, diabetes mellitus, vascular disease, age ≥65 years, and sex category (female gender) and 2 points to age ≥75 years and prior stroke/TIA].<sup>12,13</sup> Although easy to apply, the clinical risk scores including the CHA<sub>2</sub>DS<sub>2</sub>-VASc only seem to offer a modest discriminating value for the individual patients with C-statistic that range from 0.549 to 0.638,<sup>13</sup> where 1.0 is perfect discrimination and 0.5 is no better than random chance. Biomarkers derived from the blood, such as markers of inflammation, coagulation activity, cardiovascular stress, myocardial injury, and cardiac and renal dysfunction, have an increasing body of evidence showing association with clinical events and may help refine risk assessment in AF patients (Figure 1).

\* Corresponding author. Tel: +46 18 611 95 07, Fax: +46 18 51 55 70, Email: ziad.hijazi@ucr.uu.se

Published on behalf of the European Society of Cardiology. All rights reserved. © The Author 2013. For permissions please email: journals.permissions@oup.com

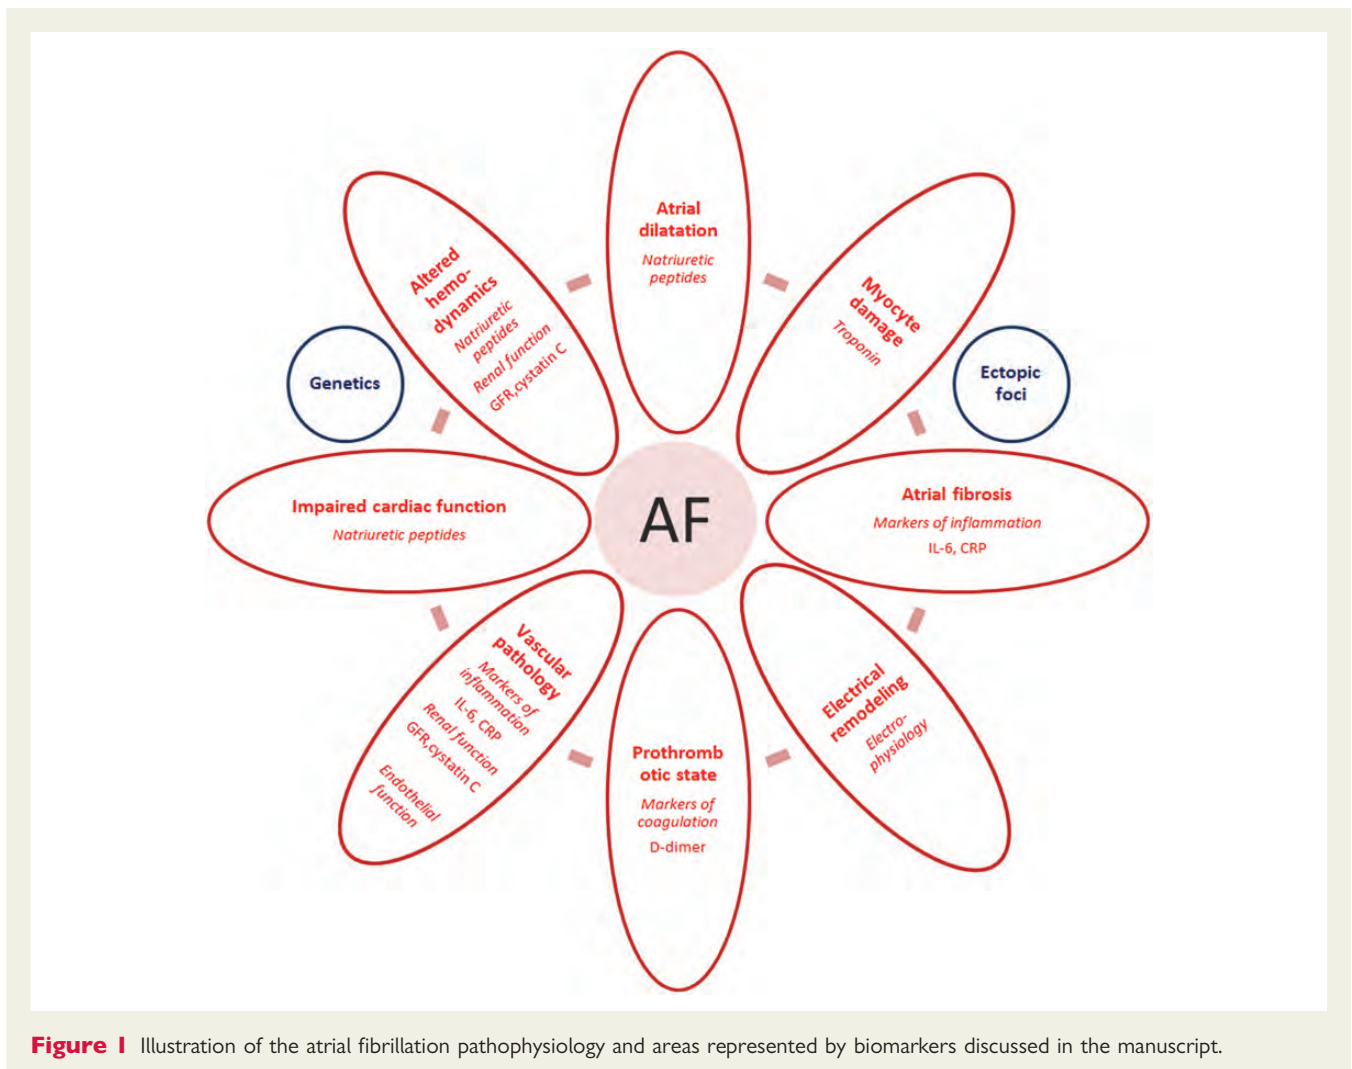

**Figure 1** Illustration of the atrial fibrillation pathophysiology and areas represented by biomarkers discussed in the manuscript.

## Cardiac biomarkers

### Myocyte injury

Cardiac troponin, an intracellular protein involved in heart muscle contraction, was initially identified as a sensitive indicator of myocardial damage and myocardial infarction.<sup>14,15</sup> Subsequent reports displayed cardiac troponin as an indicator of increased risk of reinfarction and mortality in patients with acute coronary syndromes.<sup>16,17</sup> Slight elevations in troponin level were then observed in a proportion of patients with stable coronary artery disease, heart failure, and also in elderly apparently healthy individuals and associated with worse outcomes and increased mortality independent of conventional major coronary risk factors.<sup>18–20</sup> The continuous development of more sensitive troponin methods has made it possible to detect and measure troponin level in almost all individuals when utilizing the most sensitive methods currently available.<sup>21,22</sup> The importance of troponin in an AF population was first reported from the Randomized Evaluation of Long-Term Anticoagulant Therapy (RE-LY) biomarker substudy performed in 6189 patients with AF and treated with either warfarin or dabigatran because of a raised risk of stroke.<sup>23</sup> The results

indicated, first, that detectable levels of troponin I ( $\geq 0.01 \mu\text{g/L}$ ) were common and seen in  $\sim 55\%$  of the patients with AF and at least one risk factor for stroke. Secondly, troponin was significantly and independently associated with increased risk of stroke or systemic embolism. Moreover, in comparison with CHADS<sub>2</sub> and CHA<sub>2</sub>DS<sub>2</sub>-VASc, when adding information about troponin measurements to a predictive model for stroke outcomes, the troponin I level provided significant incremental prognostic information. Thirdly, it was shown that risk assessment concerning cardiovascular death was improved by the use of troponin, both independently and when adding troponin I to the CHADS<sub>2</sub> and CHA<sub>2</sub>DS<sub>2</sub>-VASc risk scores. These results were recently confirmed in the even larger Apixaban for the Prevention of Stroke in Subjects With Atrial Fibrillation (ARISTOTLE) biomarker study, in which blood samples were collected and analysed for high-sensitivity troponin T in 14 892 patients with AF and treated with either apixaban or warfarin because of a raised risk of stroke.<sup>24</sup> By using a high-sensitivity troponin assay, it was possible to detect even lower levels of circulating troponin (lower limit of detection 1.5 ng/L). Consequently, an even larger proportion of patients, 73%, were identified to have detectable levels. The ARISTOTLE troponin

substudy results verified that the troponin levels were related to the risk of stroke and death, in a continuous fashion, independent of base-line characteristics and other biomarkers. These two studies, therefore, provide firm evidence that patients classified as having elevated troponin levels based on the 99th percentile upper reference limit for healthy subjects (troponin I  $\geq 0.04$   $\mu\text{g/L}$ , high-sensitivity troponin T  $\geq 13$  ng/L for the respective assays) had the highest rates of thrombo-embolic events and cardiovascular death independent of adjustments for clinical characteristics and other powerful biomarkers. Similar findings have also recently been reported from a registry cohort of stable chronically anticoagulated AF patients.<sup>25</sup> Patients with levels above the 50th percentile of the troponin distribution in an AF population had an increased risk of stroke, other ischaemic events, and a higher mortality regardless of their risk as estimated by the CHADS<sub>2</sub> and CHA<sub>2</sub>DS<sub>2</sub>-VASc-scores.

The origin behind elevated cardiac troponin in patients with AF requires further study. It may be due to mechanisms such as increased ventricular rate causing oxygen demand/mismatch and myocardial ischaemia, volume and pressure overload, changes in microvascular blood flow, atrial calcium overload, oxidative stress, or alterations in tissue structure.<sup>26–30</sup> Even without a complete understanding of the mechanism, the firm evidence and the general availability of cardiac troponin measurements for routine care in most hospitals worldwide makes it a very attractive candidate for use to improve prognostication of patients with AF, in addition to the currently recommended clinical risk stratification.

## Myocyte stress

B-type natriuretic peptide (BNP) is a neurohormone secreted from the myocytes mainly in response to increased wall tension such as volume or pressure overload. The levels also increase during states of haemodynamic stress, e.g. left ventricular hypertrophy, ventricular dilatation, in heart failure, acute coronary syndromes and AF as well as with ageing, renal dysfunction, and female gender.<sup>23,31–33</sup> B-type natriuretic peptide is synthesized as an inactive prohormone. It is cleaved in equimolar amounts into the bioactive hormone, BNP, which has an important role in cardiovascular remodelling and volume homeostasis, and the inactive N-terminal fragment (NT-proBNP).<sup>34</sup> Initial studies described elevated levels of natriuretic peptides in patients with AF compared with matched controls in sinus rhythm.<sup>35–37</sup> It was thereafter reported that levels of natriuretic peptides fall rapidly following restoration of sinus rhythm.<sup>38–40</sup> The usefulness of levels of natriuretic peptides to predict maintenance of sinus rhythm after successful cardioversion so far is controversial.<sup>41–43</sup> However, from a community-based population of older adults it was recently shown that elevated NT-proBNP levels predict an increased risk of development of AF independent of other risk factors including echocardiographic parameters.<sup>44</sup>

The role of natriuretic peptides as powerful prognostic markers for cardiovascular outcomes and mortality was initially established in heart failure cohorts, thereafter in patients with acute coronary syndromes and later in stable coronary artery populations and in asymptomatic community-based elderly subjects.<sup>45–49</sup> The use of natriuretic peptides for risk prediction in anticoagulated AF

patients was first reported from the 6189 patients with AF in the RE-LY biomarker study.<sup>23</sup> Although previous studies had described elevated natriuretic peptide levels in AF patients, it was not until the RE-LY results that the prognostic value of this information was highlighted. In the RELY substudy, the level of NT-proBNP correlated with the risk of thrombo-embolic events and cardiovascular mortality with higher risk at rising levels. Despite adjustment for known risk factors, the risk of stroke or systemic embolism was doubled and for cardiovascular mortality five-fold higher in patients with the highest quartile levels of NT-proBNP in comparison with patients with normal NT-proBNP levels. The addition of NT-proBNP to the CHADS<sub>2</sub> and CHA<sub>2</sub>-DS<sub>2</sub>-VASc risk stratification models resulted in significant improvements in the discrimination performance for both outcomes as well. The results from the larger ARISTOTLE biomarker study verified and extended these findings to several events and subgroups.<sup>50</sup> Thereby in the ARISTOTLE cohort the NT-proBNP level was related also to both subtypes of stroke (ischaemic or haemorrhagic). There was an especially strong association between elevated risk of ischaemic stroke and rising NT-proBNP levels.

B-type natriuretic peptide levels have also been found to predict likelihood of subsequent identification of atrial fibrillation for patients with cryptogenic stroke.<sup>51,52</sup> For patients with low BNP levels, identification of AF with subsequent monitoring was found to be very unlikely.

Apart from constituting a reliable marker of ventricular dysfunction in heart failure patients, there are arguments for NT-proBNP being of atrial origin in AF due to myocyte stress in the atria and thus reflecting atrial dysfunction.<sup>53–55</sup> The proposed model is appealing, since atrial dysfunction is an established risk factor of thrombus formation in atrial fibrillation and thereby represents a plausible pathophysiologic mechanism for the relation between natriuretic peptides and thrombo-embolic events in AF.<sup>56</sup> The improved risk prediction by adding natriuretic peptides to clinical risk stratification models is substantial and the availability of the analysis is widespread and easy accessible. Therefore, the opportunity to use measurement of NT-proBNP to improve risk stratification of AF patients in routine clinical practice is very attractive. *Figure 2* illustrates the information provided by cardiac biomarkers in regard to annual rates of a composite outcome in each CHADS<sub>2</sub>-class based on data from the RE-LY substudy.

## Cardiac biomarkers as a complement to echocardiography in atrial fibrillation

Regarding prediction of incident AF, results from the Cardiovascular Health Study displayed NT-proBNP levels to be a considerably stronger marker than any other clinical covariate as well as echocardiographic assessment which included parameters such as left ventricular dimensions, left atrial dimension, percent fractional shortening, and left ventricular mass.<sup>44</sup> Further, when a risk score was constructed to predict individuals' absolute risk of developing AF based on participants in the Framingham study, the addition of echocardiographic parameters to clinical covariates did not result in clinically meaningful changes in risk category (i.e. shifting between low, intermediate, or high risk) according to net

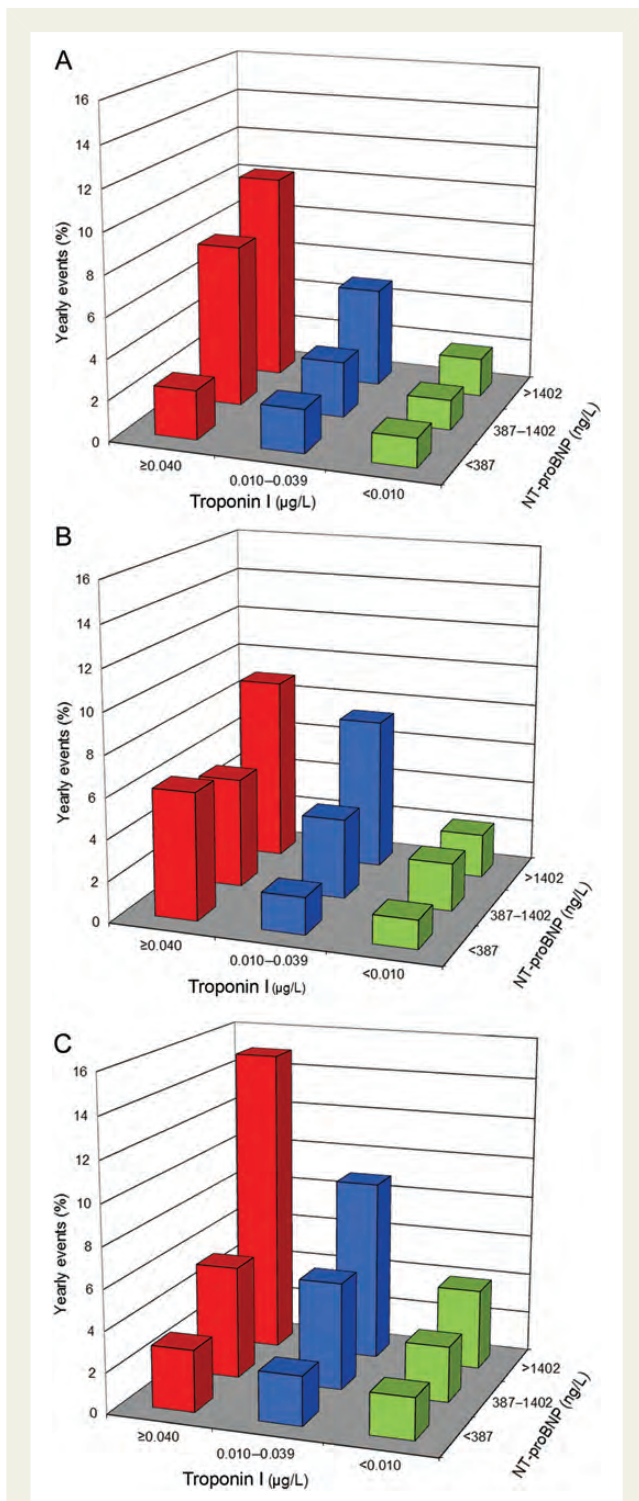

**Figure 2** (A) Outcomes according to biomarker levels in patients in the RE-LY trial with a CHADS<sub>2</sub> score of 0–1. (B) Outcomes according to biomarker levels in patients in the RE-LY trial with a CHADS<sub>2</sub> score of 2. (C) Outcomes according to biomarker levels in patients in the RE-LY trial with a CHADS<sub>2</sub> score of  $\geq 3$ . Annual event rate for a composite outcome consisting of stroke, systemic embolism, pulmonary embolism, myocardial infarction, and vascular death (excluding haemorrhagic death).

reclassification analysis.<sup>57</sup> Concerning the risk of thrombo-embolic and cardiovascular events in AF patients, there are several echocardiographic risk factors identified. The use of transoesophageal echocardiography provides information of variables associated with thromboembolism such as atrial dense spontaneous echo contrast, low flow velocities in the left atrial appendage, or the presence of left atrial thrombus.<sup>56</sup> These parameters have in small studies been linked to elevated levels of natriuretic peptides and may contribute to the prognostic properties of natriuretic peptides in AF.<sup>58–60</sup> However, based on transthoracic echocardiography, there seem to be no close association between the degree of impaired left ventricular ejection fraction and risk of thrombo-embolic events in patients with atrial fibrillation and heart failure.<sup>10,61</sup> Further, available information on left ventricular function based on echocardiography or other imaging was adjusted for in both the RE-LY and ARISTOTLE biomarkers substudy analysis, in which NT-proBNP and troponin, among others, still provided significant improvements in risk prediction. At present, guidelines recommend screening of newly detected AF patients with echocardiography in order to identify underlying structural pathologies and potential reversible causes of AF and also for tailoring of treatments.<sup>12</sup> New techniques in the field of echocardiography such as three-dimensional echocardiography, tissue Doppler imaging, or speckle tracking echocardiography may in the future add complementary information.

## Markers of renal function

### Glomerular filtration rate

Glomerular filtration rate (GFR) is accepted as a useful index of renal function. The gold standard measurement for GFR is complex and difficult to perform in daily clinical practice and requires urinary or plasma clearance of exogenous markers. Therefore, GFR is usually estimated from serum levels of endogenous filtration markers such as creatinine. Several equations exist that incorporate demographic variables such as age, gender, body size, and ethnicity along with serum creatinine to estimate GFR. Reduced GFR has been associated with an increased risk of death, adverse cardiovascular events, and bleeding events in patients with coronary artery disease as well as in the general population.<sup>62–64</sup> The prevalence of AF is higher in end stage renal disease populations compared with the general population, and the AF prevalence increases when GFR decreases in general chronic kidney disease cohorts.<sup>65–69</sup> Impaired renal function is also associated with an increased risk of short- and long-term AF recurrence after successful electrical cardioversion as well as poorer maintenance of sinus rhythm after AF ablation therapy.<sup>70–73</sup> Concerning renal function and stroke outcomes in AF, Go *et al.*<sup>74</sup> reported an independent risk increase with reduced GFR or if proteinuria was present. These results were based on estimated GFR calculated according to the Modification of Diet in Renal Disease equation. Hohnloser *et al.*<sup>75</sup> reported similar findings based on the ARISTOTLE trial population, in which increased rates of stroke and bleedings occurred as renal function deteriorated estimated with the Cockcroft-Gault and Chronic Kidney Disease Epidemiology Collaboration equations.

## Cystatin C

Cystatin C is a small protein, synthesized at a constant rate in all nucleated cells.<sup>76</sup> It is freely filtered by the glomerulus, does not return to the blood flow, is minimally influenced by disease states, and is therefore believed to be a better endogenous marker of GFR than creatinine.<sup>77</sup> Cystatin C has been proposed as a more reliable marker of renal function than serum creatinine, in particular for the detection of small reductions in GFR.<sup>77,78</sup> Chronic kidney disease is associated with a prothrombotic state and progressive vascular atherosclerosis.<sup>79,80</sup> Cystatin C is considered to reflect microvascular renal dysfunction and has been linked to elevated levels of markers of coagulation, raised levels of inflammatory markers, and severity of coronary artery disease.<sup>78,81–84</sup> In addition, cystatin C significantly improves risk stratification compared with creatinine-based estimation of GFR in both elderly and in coronary artery disease populations.<sup>85–89</sup> The significance of cystatin C in an AF population was recently reported from the ARISTOTLE and RE-LY biomarker substudies.<sup>75,90</sup> Rising cystatin C levels were independently associated with increased rates of stroke or systemic embolism, mortality, and major bleedings, and yielded an improved risk stratification and risk prediction.

Despite that renal impairment, measured with either creatinine-based equations or cystatin C, constitutes a major risk factor for thrombo-embolic and cardiovascular events in AF, renal impairment is not represented in current risk stratification models. This is a major problem as patients with renal dysfunction currently tend to be undertreated with oral anticoagulation therapy due to the associated higher bleeding risk especially when treated with vitamin-K antagonist therapy.<sup>91,92</sup> Although cystatin C achieved improved stroke risk stratification, creatinine-based estimates of renal function were better indicators of the risk of bleeding during oral anticoagulant treatment in the ARISTOTLE study. Moreover, each of the novel oral anticoagulants is cleared to some extent by the kidneys, and more so with dabigatran than the oral factor Xa inhibitors. Thus, creatinine-based estimates of GFR have the potential to be of value in estimating risk of events, as well as to select the best dose, of the new as well as old oral anticoagulants.<sup>75,90</sup>

## Markers of coagulation

### D-dimer

The prothrombotic state in AF was first described two decades ago.<sup>93–96</sup> Among markers of coagulation in AF, plasma D-dimer, a marker of fibrin turnover, is essentially used as an index of thrombogenesis and has been studied frequently. Levels of D-dimer are elevated compared with matched controls in sinus rhythm and even seem to remain elevated despite successful cardioversion.<sup>93–97</sup> Levels of D-dimer further seem to rise along with the accumulation of clinical risk factors for thromboembolism or by the presence of left atrial appendage thrombi.<sup>98–100</sup> Until recently, there were only relatively small studies to describe the prognostic value of D-dimer levels for stroke in univariable analysis or combined cardiovascular events with limited Cox adjustments.<sup>101,102</sup> However, the recent preliminary reports from the RE-LY biomarker study in 6216 patients with AF describe a

significant association between baseline D-dimer levels and the risk of stroke, cardiovascular death, and major bleeding outcomes independent of established risk factors including the CHADS<sub>2</sub> variables.<sup>103</sup> The risk increased with higher D-dimer levels as evidenced by a three-fold increase of stroke or systemic embolism and 3.5-fold increase for cardiovascular mortality when the top vs. bottom quartiles were compared. These results were recently confirmed in the larger ARISTOTLE biomarker substudy demonstrating that D-dimer levels at baseline, regardless of ongoing vitamin-K antagonist treatment, are related to stroke, mortality, and major bleeding.<sup>104,105</sup> These results suggest that D-dimer may also be a clinically useful risk marker in AF.

## Markers of inflammation

### Interleukin 6 and C-reactive protein

There is growing evidence that inflammation may be associated with AF as well as the pathogenesis of the arrhythmia.<sup>6,106–109</sup> C-reactive protein (CRP) is an acute-phase protein produced by the liver in response to stimuli by among others interleukins such as interleukin 6 (IL-6) triggered by inflammation.<sup>110–112</sup> Interleukin 6 and CRP are robust and established markers of inflammation and have been most frequently studied in cardiovascular diseases and AF.<sup>113,114</sup> Although some inconsistencies exist, the majority of studies have reported elevated CRP levels or other inflammatory markers to be independent risk factors for incidence of AF in subjects with no history of AF.<sup>106,115–118</sup> The majority of trials also indicate elevated levels of inflammatory markers in AF compared with control despite some differences in significance when applying multivariable modelling.<sup>106,108,119–121</sup> Further, there are data indicating a correlation between markers of inflammation and AF burden,<sup>106</sup> increasing levels of inflammatory markers with accumulation of risk factors<sup>121–123</sup>, and the effect on cardioversion such that higher levels attenuate success rate and independently confers poorer sinus rhythm maintenance.<sup>124–131</sup> Together, the results indicate that the inflammatory process has an importance both for the development and perpetuation of AF.<sup>114</sup> Inflammation also seems to have prognostic importance in AF populations. In 2004, Conway *et al.*<sup>132</sup> based on a small study, reported the association between IL-6 and a composite outcome of stroke and death. Later, the prognostic value of CRP to all-cause mortality and a composite of ischaemic stroke, myocardial infarction, or vascular death was displayed in a larger cohort based on the Stroke Prevention in Atrial Fibrillation (SPAF) III trial.<sup>133</sup> Recent studies confirm these results in which CRP has been independently related to mortality and IL-6 to all-cause death and a composite consisting of stroke/TIA, systemic embolism, acute coronary syndrome, acute heart failure, and cardiac death.<sup>25,134</sup> Preliminary results from the RE-LY biomarker substudy showed an independent association between IL-6 and stroke or systemic embolic events in ~ 6200 AF patients.<sup>135</sup> In patients with top quartile levels compared with the bottom quartile, there was a doubling of stroke risk in adjusted analysis. IL-6 was also independently and incrementally associated with cardiovascular mortality. C-reactive protein quartile levels, however, only remained independently associated with cardiovascular

mortality after multivariable adjustments. The association between inflammatory markers and thrombo-embolic events may be due to the link between inflammation and the prothrombotic state in AF seen in several settings.<sup>121,136–138</sup> The indications of an inflammatory state as a component of the AF disease and its relation to several outcomes makes inflammatory activity an interesting target for further investigation in this condition. Still it seems too early to include an unspecific indicator of inflammatory activity as a routine marker in the risk stratification of patients with AF.

## Future prospects

### Therapeutic decisions based on biomarkers

Identification of patients needing oral anticoagulant treatment might be improved by addition of biomarkers to clinical risk factors. However, such a strategy needs further evaluation before implementation in clinical practice. Tailoring of other therapeutic options based on biomarkers has not been studied in AF cohorts. There is some evidence of improved outcomes in chronic heart failure patients in which participants randomized to NT-proBNP level guided treatment had improved outcomes compared with standard care.<sup>139–141</sup> Whether biomarkers can play a similar role in AF needs to be elucidated.

## Discussion

A multitude of biomarkers are available and new ones are constantly being identified and assessed. Biomarkers may increase the understanding of the pathogenesis of AF as well as refine future risk prediction. Some markers appear to reflect the pathophysiologic process for development of AF, while others may simply be suited as markers of risk for future cardiovascular events. It is typically difficult to draw firm conclusions concerning the involvement of a biomarker in the aetiology of a disease. Often a biomarker may simply be a marker of disease severity or comorbidity that relates to risk. However, biomarkers have increasing clinical importance and will anticipate that biomarkers will play a key role in refining clinical risk assessment in patients with AF as presented in this review. Further, the biomarkers discussed in this review have mostly been assessed individually. The implementation of a multimarker strategy will likely further improve risk stratification as have been described for coronary artery disease populations.<sup>16,17</sup> In fact, in the AF population, the importance of a multimarker approach was highlighted by the incremental prognostic information by the simultaneous use of cardiac troponin and natriuretic peptides compared with information obtained by each biomarker separately.<sup>23</sup> Therefore, the forthcoming testing and verification of multimarker-based risk stratification in the large clinical trial cohorts and other materials are eagerly awaited. Biomarkers may further have a role in predicting treatment response and treatment selection as indicated by results concerning pulmonary vein isolation outcomes, the use of renal markers regarding assessment of bleeding risk with new oral anticoagulation drugs, or data supporting genetic markers for tailoring of warfarin dosage.<sup>70,71,75,142–145</sup> It is also likely that as proteomics

evolves and the field of studying biological systems improves, an even greater number of useful biomarkers will be identified that may enhance the understanding of the pathophysiology in AF, treatment monitoring, potential drug targets, and possibly even early disease detection.

**Conflict of interest:** All the authors have read and approved submission of the final manuscript and the manuscript has not been published and is not being considered for publication elsewhere in whole or part in any language. The full list of disclosures of all the authors is detailed below. Z.H.: lecture fees and an institutional research grant from Boehringer-Ingelheim. J.O.: consulting and lecture fees and grant support from BoehringerIngelheim, and consultant and lecture fees from Bayer and Bristol-Myers Squibb. A.S.: institutional grants from AstraZeneca and BoehringerIngelheim. C.B.G.: grants from Bristol-Myers Squibb, BoehringerIngelheim, Astellas, AstraZeneca, GlaxoSmithKline, Medtronic foundation, Merck, Sanofi-Aventis, and the Medicine's Company; consulting fees from Bristol-Myers Squibb, Pfizer, BoehringerIngelheim, AstraZeneca, Lilly, GlaxoSmithKline, Hoffman-La Roche, Novartis, Otsuka, Sanofi-Aventis, and the Medicine's Company; travel support from Pfizer, Novartis, Otsuka, and Hoffmann-La Roche. L.W.: research grants from AstraZeneca, Merck/Schering-Plough, BoehringerIngelheim, Bristol-Myers Squibb/Pfizer, GlaxoSmithKline; consultant for Merck/Schering-Plough, Regado Biosciences, Evolva, Portola, C.S.L. Behring, Athera Biotechnologies, BoehringerIngelheim, AstraZeneca, GlaxoSmithKline, and Bristol-Myers Squibb/Pfizer; lecture fees from AstraZeneca, BoehringerIngelheim, Bristol-Myers Squibb/Pfizer, GlaxoSmithKline, Schering-Plough; honoraria from BoehringerIngelheim, AstraZeneca, Bristol-Myers Squibb/Pfizer, GlaxoSmithKline, and Schering-Plough/Merck.

## References

1. Benjamin EJ, Wolf PA, D'Agostino RB, Silbershatz H, Kannel WB, Levy D. Impact of atrial fibrillation on the risk of death: the Framingham Heart Study. *Circulation* 1998;**98**:946–952.
2. Wolf PA, Abbott RD, Kannel WB. Atrial fibrillation as an independent risk factor for stroke: the Framingham Study. *Stroke* 1991;**22**:983–988.
3. Go AS, Hylek EM, Phillips KA, Chang Y, Henault LE, Selby JV, Singer DE. Prevalence of diagnosed atrial fibrillation in adults: national implications for rhythm management and stroke prevention: the AnTicoagulation and Risk Factors in Atrial Fibrillation (ATRIA) Study. *J Am Med Assoc* 2001;**285**:2370–2375.
4. Kannel WB, Wolf PA, Benjamin EJ, Levy D. Prevalence, incidence, prognosis, and predisposing conditions for atrial fibrillation: population-based estimates. *Am J Cardiol* 1998;**82**:2N–9N.
5. Daoud EG, Bogun F, Goyal R, Harvey M, Man KC, Strickberger SA, Morady F. Effect of atrial fibrillation on atrial refractoriness in humans. *Circulation* 1996;**94**:1600–1606.
6. Frustaci A, Chimenti C, Bellocci F, Morgante E, Russo MA, Maseri A. Histological substrate of atrial biopsies in patients with lone atrial fibrillation. *Circulation* 1997;**96**:1180–1184.
7. Savelieva I, John Camm A. Atrial fibrillation and heart failure: natural history and pharmacological treatment. *Europace* 2004;**5**(Suppl 1):S5–S19.
8. Tsang TS, Gersh BJ, Appleton CP, Tajik AJ, Barnes ME, Bailey KR, Oh JK, Leibson C, Montgomery SC, Seward JB. Left ventricular diastolic dysfunction as a predictor of the first diagnosed nonvalvular atrial fibrillation in 840 elderly men and women. *J Am Coll Cardiol* 2002;**40**:1636–1644.
9. Haissaguerre M, Jais P, Shah DC, Takahashi A, Hocini M, Quiniou G, Garrigue S, Le Mouroux A, Le Metayer P, Clementy J. Spontaneous initiation of atrial fibrillation by ectopic beats originating in the pulmonary veins. *N Engl J Med* 1998;**339**:659–666.

10. Group. SRIAFW. Independent predictors of stroke in patients with atrial fibrillation: a systematic review. *Neurology* 2007;**69**:546–554.
11. Hughes M, Lip GY. Stroke and thromboembolism in atrial fibrillation: a systematic review of stroke risk factors, risk stratification schema and cost effectiveness data. *Thromb Haemost* 2008;**99**:295–304.
12. Camm AJ, Kirchhof P, Lip GY, Schotten U, Savelieva I, Ernst S, Van Gelder IC, Al-Attar N, Hindricks G, Prendergast B, Heidbuchel H, Alfieri O, Angelini A, Atar D, Colonna P, De Caterina R, De Sutter J, Goette A, Gorenek B, Heldal M, Hohloser SH, Kolh P, Le Heuzey JY, Ponikowski P, Rutten FH. Guidelines for the management of atrial fibrillation: the Task Force for the Management of Atrial Fibrillation of the European Society of Cardiology (ESC). *Eur Heart J* 2010;**31**:2369–2429.
13. Lip GY, Nieuwlaet R, Pisters R, Lane DA, Crijns HJ. Refining clinical risk stratification for predicting stroke and thromboembolism in atrial fibrillation using a novel risk factor-based approach: the euro heart survey on atrial fibrillation. *Chest* 2010;**137**:263–272.
14. Antman EM, Tanasijevic MJ, Thompson B, Schactman M, McCabe CH, Cannon CP, Fischer GA, Fung AY, Thompson C, Wybenga D, Braunwald E. Cardiac-specific troponin I levels to predict the risk of mortality in patients with acute coronary syndromes. *N Engl J Med* 1996;**335**:1342–1349.
15. Katus HA, Remppis A, Neumann FJ, Scheffold T, Diederich KW, Vinar G, Noe A, Matern G, Kuebler W. Diagnostic efficiency of troponin T measurements in acute myocardial infarction. *Circulation* 1991;**83**:902–912.
16. James SK, Armstrong P, Barnathan E, Califf R, Lindahl B, Siegbahn A, Simoons ML, Topol EJ, Venge P, Wallentin L. Troponin and C-reactive protein have different relations to subsequent mortality and myocardial infarction after acute coronary syndrome: a GUSTO-IV substudy. *J Am Coll Cardiol* 2003;**41**:916–924.
17. Lindahl B, Toss H, Siegbahn A, Venge P, Wallentin L. Markers of myocardial damage and inflammation in relation to long-term mortality in unstable coronary artery disease. FRISC Study Group. *N Engl J Med* 2000;**343**:1139–1147.
18. Horwich TB, Patel J, MacLellan WR, Fonarow GC. Cardiac troponin I is associated with impaired hemodynamics, progressive left ventricular dysfunction, and increased mortality rates in advanced heart failure. *Circulation* 2003;**108**:833–838.
19. Omland T, de Lemos JA, Sabatine MS, Christophi CA, Rice MM, Jablonski KA, Tjora S, Domanski MJ, Gersh BJ, Rouleau JL, Pfeffer MA, Braunwald E. A sensitive cardiac troponin T assay in stable coronary artery disease. *N Engl J Med* 2009;**361**:2538–2547.
20. Zethelius B, Johnston N, Venge P. Troponin I as a predictor of coronary heart disease and mortality in 70-year-old men: a community-based cohort study. *Circulation* 2006;**113**:1071–1078.
21. Giannitsis E, Kurz K, Hallermayer K, Jarausch J, Jaffe AS, Katus HA. Analytical validation of a high-sensitivity cardiac troponin T assay. *Clin Chem* 2010;**56**:254–261.
22. Venge P, Johnston N, Lindahl B, James S. Normal plasma levels of cardiac troponin I measured by the high-sensitivity cardiac troponin I access prototype assay and the impact on the diagnosis of myocardial ischemia. *J Am Coll Cardiol* 2009;**54**:1165–1172.
23. Hijazi Z, Oldgren J, Andersson U, Connolly SJ, Ezekowitz MD, Hohnloser SH, Reilly PA, Vinereanu D, Siegbahn A, Yusuf S, Wallentin L. Cardiac biomarkers are associated with an increased risk of stroke and death in patients with atrial fibrillation: a randomized evaluation of long-term anticoagulation therapy (RE-LY) substudy. *Circulation* 2012;**125**:1605–1616.
24. Wallentin L, Hijazi Z, Siegbahn A, Schollin M, Alexander JH, Atar D, Bernard Gersh BJ, Hanna M, Harjola VP, Horowitz J, Husted S, Hylek EM, Lopes RD, McMurray JJV, Granger CB, on behalf of the ARISTOTLE Investigators. High sensitivity troponin-T for risk stratification in atrial fibrillation during treatment with apixaban or warfarin. *European Heart Journal* 2012;**33** (Abstract Supplement 53).
25. Roldan V, Marin F, Diaz J, Gallego P, Jover E, Romera M, Manzano-Fernandez S, Casas T, Valdes M, Vicente V, Lip GY. High sensitivity cardiac troponin T and interleukin-6 predict adverse cardiovascular events and mortality in anticoagulated patients with atrial fibrillation. *J Thromb Haemost* 2012;**10**:1500–1507.
26. Dobrev D, Nattel S. Calcium handling abnormalities in atrial fibrillation as a target for innovative therapeutics. *J Cardiovasc Pharmacol* 2008;**52**:293–299.
27. Eggers KM, Lind L, Ahlstrom H, Bjerner T, Ebeling Barbier C, Larsson A, Venge P, Lindahl B. Prevalence and pathophysiological mechanisms of elevated cardiac troponin I levels in a population-based sample of elderly subjects. *Eur Heart J* 2008;**29**:2252–2258.
28. Fuster V, Ryden LE, Cannon DS, Crijns HJ, Curtis AB, Ellenbogen KA, Halperin JL, Le Heuzey JY, Kay GN, Lowe JE, Olsson SB, Prystowsky EN, Tamargo JL, Wann S. ACC/AHA/ESC 2006 guidelines for the management of patients with atrial fibrillation-executive summary: a report of the American College of Cardiology/American Heart Association Task Force on Practice Guidelines and the European Society of Cardiology Committee for Practice Guidelines (Writing Committee to Revise the 2001 Guidelines for the Management of Patients with Atrial Fibrillation). *Eur Heart J* 2006;**27**:1979–2030.
29. Jeremias A, Gibson CM. Narrative review: alternative causes for elevated cardiac troponin levels when acute coronary syndromes are excluded. *Ann Intern Med* 2005;**142**:786–791.
30. Pirat B, Atar I, Ertan C, Bozbas H, Gulmez O, Muderrisoglu H, Ozin B. Comparison of C-reactive protein levels in patients who do and do not develop atrial fibrillation during electrophysiologic study. *Am J Cardiol* 2007;**100**:1552–1555.
31. Daniels LB, Maisel AS. Natriuretic peptides. *J Am Coll Cardiol* 2007;**50**:2357–2368.
32. Johnston N, Jernberg T, Lindahl B, Lindback J, Stridsberg M, Larsson A, Venge P, Wallentin L. Biochemical indicators of cardiac and renal function in a healthy elderly population. *Clin Biochem* 2004;**37**:210–216.
33. Redfield MM, Rodeheffer RJ, Jacobsen SJ, Mahoney DW, Bailey KR, Burnett JC Jr. Plasma brain natriuretic peptide concentration: impact of age and gender. *J Am Coll Cardiol* 2002;**40**:976–982.
34. Boomsma F, van den Meiracker AH. Plasma A- and B-type natriuretic peptides: physiology, methodology and clinical use. *Cardiovasc Res* 2001;**51**:442–449.
35. Ellinor PT, Low AF, Patton KK, Shea MA, Macrae CA. Discordant atrial natriuretic peptide and brain natriuretic peptide levels in lone atrial fibrillation. *J Am Coll Cardiol* 2005;**45**:82–86.
36. Shelton RJ, Clark AL, Goode K, Rigby AS, Cleland JG. The diagnostic utility of N-terminal pro-B-type natriuretic peptide for the detection of major structural heart disease in patients with atrial fibrillation. *Eur Heart J* 2006;**27**:2353–2361.
37. Silvet H, Young-Xu Y, Walleigh D, Ravid S. Brain natriuretic peptide is elevated in outpatients with atrial fibrillation. *Am J Cardiol* 2003;**92**:1124–1127.
38. Jourdain P, Bellorini M, Funck F, Fulla Y, Guillard N, Loiret J, Thebault B, Sadeg N, Desnos M. Short-term effects of sinus rhythm restoration in patients with lone atrial fibrillation: a hormonal study. *Eur J Heart Fail* 2002;**4**:263–267.
39. Wozakowska-Kaplon B. Effect of sinus rhythm restoration on plasma brain natriuretic peptide in patients with atrial fibrillation. *Am J Cardiol* 2004;**93**:1555–1558.
40. Yamada T, Murakami Y, Okada T, Okamoto M, Shimizu T, Toyama J, Yoshida Y, Tsuboi N, Ito T, Muto M, Kondo T, Inden Y, Hirai M, Murohara T. Plasma atrial natriuretic peptide and brain natriuretic peptide levels after radiofrequency catheter ablation of atrial fibrillation. *Am J Cardiol* 2006;**97**:1741–1744.
41. Beck-da-Silva L, de Bold A, Fraser M, Williams K, Haddad H. Brain natriuretic peptide predicts successful cardioversion in patients with atrial fibrillation and maintenance of sinus rhythm. *Can J Cardiol* 2004;**20**:1245–1248.
42. Freynhofer MK, Jarai R, Hochtl T, Bruno V, Vogel B, Aydinkoc K, Nurnberg M, Wojta J, Huber K. Predictive value of plasma NT-proBNP and body mass index for recurrence of atrial fibrillation after cardioversion. *Int J Cardiol* 2011;**149**:257–259.
43. Lellouche N, Berthier R, Mekontso-Dessap A, Braconnier F, Monin JL, Duval AM, Dubois-Rande JL, Gueret P, Garot J. Usefulness of plasma B-type natriuretic peptide in predicting recurrence of atrial fibrillation one year after external cardioversion. *Am J Cardiol* 2005;**95**:1380–1382.
44. Patton KK, Ellinor PT, Heckbert SR, Christenson RH, DeFilippi C, Gottdiener JS, Kronmal RA. N-terminal pro-B-type natriuretic peptide is a major predictor of the development of atrial fibrillation: the Cardiovascular Health Study. *Circulation* 2009;**120**:1768–1774.
45. Fonarow GC, Peacock WF, Phillips CO, Givertz MM, Lopatin M. Admission B-type natriuretic peptide levels and in-hospital mortality in acute decompensated heart failure. *J Am Coll Cardiol* 2007;**49**:1943–1950.
46. James SK, Lindahl B, Siegbahn A, Stridsberg M, Venge P, Armstrong P, Barnathan ES, Califf R, Topol EJ, Simoons ML, Wallentin L. N-terminal pro-brain natriuretic peptide and other risk markers for the separate prediction of mortality and subsequent myocardial infarction in patients with unstable coronary artery disease: a Global Utilization of Strategies To Open occluded arteries (GUSTO)-IV substudy. *Circulation* 2003;**108**:275–281.
47. Kragelund C, Gronning B, Kober L, Hildebrandt P, Steffensen R. N-terminal pro-B-type natriuretic peptide and long-term mortality in stable coronary heart disease. *N Engl J Med* 2005;**352**:666–675.
48. Tsutamoto T, Wada A, Maeda K, Hisanaga T, Maeda Y, Fukui D, Ohnishi M, Sugimoto Y, Kinoshita M. Attenuation of compensation of endogenous cardiac natriuretic peptide system in chronic heart failure: prognostic role of plasma brain natriuretic peptide concentration in patients with chronic symptomatic left ventricular dysfunction. *Circulation* 1997;**96**:509–516.
49. Wang TJ, Larson MG, Levy D, Benjamin EJ, Leip EP, Omland T, Wolf PA, Vasan RS. Plasma natriuretic peptide levels and the risk of cardiovascular events and death. *N Engl J Med* 2004;**350**:655–663.
50. Hijazi Z, Wallentin L, Siegbahn A, Andersson U, Christersson C, Ezekowitz J, Gersh BJ, Hanna M, Hohnloser S, Horowitz J, Huber K, Hylek EH, Lopes ED, McMurray JJV, Granger CB. NT-proBNP for risk stratification in atrial fibrillation

- during treatment with apixaban or warfarin. *European Heart Journal* 2012;**33**. (Abstract Supplement, 51).
51. Shibazaki K, Kimura K, Fujii S, Sakai K, Iguchi Y. Brain natriuretic peptide levels as a predictor for new atrial fibrillation during hospitalization in patients with acute ischemic stroke. *Am J Cardiol* 2012;**109**:1303–1307.
  52. Suissa L, Bresch S, Lachaud S, Mahagne MH. Brain natriuretic peptide: a relevant marker to rule out delayed atrial fibrillation in stroke patient. *J Stroke Cerebrovasc Dis* 2012.
  53. Goetze JP, Friis-Hansen L, Rehfeld JF, Nilsson B, Svendsen JH. Atrial secretion of B-type natriuretic peptide. *Eur Heart J* 2006;**27**:1648–1650.
  54. Inoue S, Murakami Y, Sano K, Katoh H, Shimada T. Atrium as a source of brain natriuretic polypeptide in patients with atrial fibrillation. *J Card Fail* 2000;**6**: 92–96.
  55. Yasue H, Yoshimura M, Sumida H, Kikuta K, Kugiyama K, Jougasaki M, Ogawa H, Okumura K, Mukoyama M, Nakao K. Localization and mechanism of secretion of B-type natriuretic peptide in comparison with those of A-type natriuretic peptide in normal subjects and patients with heart failure. *Circulation* 1994;**90**: 195–203.
  56. SPAF, Echocardiography TSPiAFiCo. Transesophageal echocardiographic correlates of thromboembolism in high-risk patients with nonvalvular atrial fibrillation. The Stroke Prevention in Atrial Fibrillation Investigators Committee on Echocardiography. *Ann Intern Med* 1998;**128**:639–647.
  57. Schnabel RB, Sullivan LM, Levy D, Pencina MJ, Massaro JM, D'Agostino RB Sr, Newton-Cheh C, Yamamoto JF, Magnani JW, Tadros TM, Kannel WB, Wang TJ, Ellinor PT, Wolf PA, Vasan RS, Benjamin EJ. Development of a risk score for atrial fibrillation (Framingham Heart Study): a community-based cohort study. *Lancet* 2009;**373**:739–745.
  58. Igarashi Y, Kashimura K, Makiyama Y, Sato T, Ojima K, Aizawa Y. Left atrial appendage dysfunction in chronic nonvalvular atrial fibrillation is significantly associated with an elevated level of brain natriuretic peptide and a prothrombotic state. *Jpn Circ J* 2001;**65**:788–792.
  59. Shimizu H, Murakami Y, Inoue S, Ohta Y, Nakamura K, Katoh H, Sakne T, Takahashi N, Ohata S, Sugamori T, Ishibashi Y, Shimada T. High plasma brain natriuretic polypeptide level as a marker of risk for thromboembolism in patients with nonvalvular atrial fibrillation. *Stroke* 2002;**33**:1005–1010.
  60. Tamura H, Watanabe T, Nishiyama S, Sasaki S, Wanezaki M, Arimoto T, Takahashi H, Shishido T, Miyashita T, Miyamoto T, Hirono O, Kayama T, Kubota I. Elevated plasma brain natriuretic peptide levels predict left atrial appendage dysfunction in patients with acute ischemic stroke. *J Cardiol* 2012;**60**: 126–132.
  61. Banerjee A, Taillandier S, Olesen JB, Lane DA, Lallemand B, Lip GY, Fauchier L. Ejection fraction and outcomes in patients with atrial fibrillation and heart failure: the Loire Valley Atrial Fibrillation Project. *Eur J Heart Fail* 2012;**14**: 295–301.
  62. Al Suwaidi J, Reddan DN, Williams K, Pieper KS, Harrington RA, Califf RM, Granger CB, Ohman EM, Holmes DR Jr. Prognostic implications of abnormalities in renal function in patients with acute coronary syndromes. *Circulation* 2002;**106**:974–980.
  63. Go AS, Chertow GM, Fan D, McCulloch CE, Hsu CY. Chronic kidney disease and the risks of death, cardiovascular events, and hospitalization. *N Engl J Med* 2004;**351**:1296–305.
  64. Santopinto JJ, Fox KA, Goldberg RJ, Budaj A, Pinero G, Avezum A, Gulba D, Esteban J, Gore JM, Johnson J, Gurfinkel EP. Creatinine clearance and adverse hospital outcomes in patients with acute coronary syndromes: findings from the global registry of acute coronary events (GRACE). *Heart* 2003;**89**: 1003–1008.
  65. Ananthapanyasut W, Napan S, Rudolph EH, Harindhanavudhi T, Ayash H, Guglielmi KE, Lerma EV. Prevalence of atrial fibrillation and its predictors in non-dialysis patients with chronic kidney disease. *Clin J Am Soc Nephrol* 2010;**5**: 173–181.
  66. Deo R, Katz R, Kestenbaum B, Fried L, Sarnak MJ, Psaty BM, Siscovick DS, Shlipak MG. Impaired kidney function and atrial fibrillation in elderly subjects. *J Card Fail* 2010;**16**:55–60.
  67. Genovesi S, Pogliani D, Faini A, Valsecchi MG, Riva A, Stefani F, Acquistapace I, Stella A, Bonforte G, DeVecchi A, DeCristofaro V, Buccianti G, Vincenti A. Prevalence of atrial fibrillation and associated factors in a population of long-term hemodialysis patients. *Am J Kidney Dis* 2005;**46**:897–902.
  68. Iguchi Y, Kimura K, Kobayashi K, Aoki J, Terasawa Y, Sakai K, Uemura J, Shibazaki K. Relation of atrial fibrillation to glomerular filtration rate. *Am J Cardiol* 2008;**102**:1056–1059.
  69. McManus DD, Corteville DC, Shlipak MG, Whooley MA, Ix JH. Relation of kidney function and albuminuria with atrial fibrillation (from the Heart and Soul Study). *Am J Cardiol* 2009;**104**:1551–1555.
  70. Berkowitsch A, Kuniss M, Greiss H, Wojcik M, Zaltsberg S, Lehinant S, Erkapic D, Pajitnev D, Pitschner HF, Hamm CW, Neumann T. Impact of impaired renal function and metabolic syndrome on the recurrence of atrial fibrillation after catheter ablation: a long term follow-up. *Pacing Clin Electrophysiol* 2012;**35**:532–543.
  71. Chao TF, Lin YJ, Chang SL, Lo LW, Hu YF, Tuan TC, Suenari K, Li CH, Chen SA. Associations between renal function, atrial substrate properties and outcome of catheter ablation in patients with paroxysmal atrial fibrillation. *Circ J* 2011;**75**: 2326–2332.
  72. Schmidt M, Daccarett M, Rittger H, Marschang H, Holzmann S, Jung P, Bojanic D, Ketteler M, Brachmann J, Rieber J. Renal dysfunction and atrial fibrillation recurrence following cardioversion. *J Cardiovasc Electrophysiol* 2011;**22**:1092–1098.
  73. Schmidt M, Rieber J, Daccarett M, Marschang H, Sinha AM, Biggar P, Jung P, Ketteler M, Brachmann J, Rittger H. Relation of recurrence of atrial fibrillation after successful cardioversion to renal function. *Am J Cardiol* 2010;**105**:368–372.
  74. Go AS, Fang MC, Udaltsova N, Chang Y, Pomernacki NK, Borowsky L, Singer DE. Impact of proteinuria and glomerular filtration rate on risk of thromboembolism in atrial fibrillation: the anticoagulation and risk factors in atrial fibrillation (ATRIA) study. *Circulation* 2009;**119**:1363–1369.
  75. Hohnloser SH, Hijazi Z, Thomas L, Alexander JH, Amerena J, Hanna M, Keltai M, Lanas F, Lopes RD, Lopez-Sendon J, Granger CB, Wallha L. Efficacy of apixaban when compared with warfarin in relation to renal function in patients with atrial fibrillation: insights from the ARISTOTLE trial. *Eur Heart J* 2012;**33**: 2821–2830.
  76. Abrahamson M, Olafsson I, Palsdottir A, Ulvback M, Lundwall A, Jansson O, Grubb A. Structure and expression of the human cystatin C gene. *Biochem J* 1990;**268**:287–294.
  77. Laterza OF, Price CP, Scott MG. Cystatin C: an improved estimator of glomerular filtration rate? *Clin Chem* 2002;**48**:699–707.
  78. Newman DJ, Thakkar H, Edwards RG, Wilkie M, White T, Grubb AO, Price CP. Serum cystatin C measured by automated immunoassay: a more sensitive marker of changes in GFR than serum creatinine. *Kidney Int* 1995;**47**:312–318.
  79. Casserly LF, Dember LM. Thrombosis in end-stage renal disease. *Semin Dial* 2003;**16**:245–256.
  80. Seliger SL, Gillen DL, Longstreth WT Jr, Kestenbaum B, Stehman-Breen CO. Elevated risk of stroke among patients with end-stage renal disease. *Kidney Int* 2003;**64**:603–609.
  81. Dubin R, Cushman M, Folsom AR, Fried LF, Palmas W, Peralta CA, Wassel C, Shlipak MG. Kidney function and multiple hemostatic markers: cross sectional associations in the multi-ethnic study of atherosclerosis. *BMC Nephrol* 2011;**12**:3.
  82. Imai A, Komatsu S, Ohara T, Kamata T, Yoshida J, Miyaji K, Shimizu Y, Takewa M, Hirayama A, Deshpande GA, Takahashi O, Kodama K. Serum cystatin C is associated with early stage coronary atherosclerotic plaque morphology on multidetector computed tomography. *Atherosclerosis* 2011.
  83. Knight EL, Verhave JC, Spiegelman D, Hillege HL, de Zeeuw D, Curhan GC, de Jong PE. Factors influencing serum cystatin C levels other than renal function and the impact on renal function measurement. *Kidney Int* 2004;**65**:1416–1421.
  84. Wang J, Sim AS, Wang XL, Saloniakas C, Moriatis M, Naidoo D, Wilcken DE. Relations between markers of renal function, coronary risk factors and the occurrence and severity of coronary artery disease. *Atherosclerosis* 2008;**197**: 853–859.
  85. Ix JH, Shlipak MG, Chertow GM, Whooley MA. Association of cystatin C with mortality, cardiovascular events, and incident heart failure among persons with coronary heart disease: data from the Heart and Soul Study. *Circulation* 2007;**115**:173–179.
  86. Jernberg T, Lindahl B, James S, Larsson A, Hansson LO, Wallentin L. Cystatin C: a novel predictor of outcome in suspected or confirmed non-ST-elevation acute coronary syndrome. *Circulation* 2004;**110**:2342–2348.
  87. Shlipak MG, Katz R, Sarnak MJ, Fried LF, Newman AB, Stehman-Breen C, Seliger SL, Kestenbaum B, Psaty B, Tracy RP, Siscovick DS. Cystatin C and prognosis for cardiovascular and kidney outcomes in elderly persons without chronic kidney disease. *Ann Intern Med* 2006;**145**:237–246.
  88. Shlipak MG, Sarnak MJ, Katz R, Fried LF, Seliger SL, Newman AB, Siscovick DS, Stehman-Breen C. Cystatin C and the risk of death and cardiovascular events among elderly persons. *N Engl J Med* 2005;**352**:2049–2060.
  89. Shlipak MG, Wassel Fyr CL, Chertow GM, Harris TB, Kritchevsky SB, Tylavsky FA, Satterfield S, Cummings SR, Newman AB, Fried LF. Cystatin C and mortality risk in the elderly: the health, aging, and body composition study. *J Am Soc Nephrol* 2006;**17**:254–261.
  90. Hijazi Z, Oldgren J, Andersson U, Connolly SJ, Ezekowitz MD, Hohnloser SH, Reilly PA, Siegbahn A, Yusuf S, Wallentin L. Cystatin C is Prognostic for Stroke, Death and Bleeding during anticoagulation of atrial fibrillation - a RELY substudy. *Circulation* 2011; (Abstract supplement AHA 124: A12492).
  91. Piccini JP, Hernandez AF, Zhao X, Patel MR, Lewis WR, Peterson ED, Fonarow GC. Quality of care for atrial fibrillation among patients hospitalized for heart failure. *J Am Coll Cardiol* 2009;**54**:1280–1289.



92. Reinecke H, Brand E, Mesters R, Schabitz WR, Fisher M, Pavenstadt H, Breithardt G. Dilemmas in the management of atrial fibrillation in chronic kidney disease. *J Am Soc Nephrol* 2009;**20**:705–711.
93. Asakura H, Hifumi S, Jokaji H, Saito M, Kumabashiri I, Uotani C, Morishita E, Yamazaki M, Shibata K, Mizuhashi K. Prothrombin fragment F1 + 2 and thrombin-antithrombin III complex are useful markers of the hypercoagulable state in atrial fibrillation. *Blood Coagul Fibrinolysis* 1992;**3**:469–473.
94. Gustafsson C, Blomback M, Britton M, Hamsten A, Svensson J. Coagulation factors and the increased risk of stroke in nonvalvular atrial fibrillation. *Stroke* 1990;**21**:47–51.
95. Kumagai K, Fukunami M, Ohmori M, Kitabatake A, Kamada T, Hoki N. Increased intracardiovascular clotting in patients with chronic atrial fibrillation. *J Am Coll Cardiol* 1990;**16**:377–380.
96. Lip GY, Lowe GD, Rumley A, Dunn FG. Increased markers of thrombogenesis in chronic atrial fibrillation: effects of warfarin treatment. *Br Heart J* 1995;**73**:527–533.
97. Marin F, Roldan V, Climent VE, Ibanez A, Garcia A, Marco P, Sogorb F, Lip GY. Plasma von Willebrand factor, soluble thrombomodulin, and fibrin D-dimer concentrations in acute onset non-rheumatic atrial fibrillation. *Heart* 2004;**90**:1162–1166.
98. Habara S, Dote K, Kato M, Sasaki S, Goto K, Takemoto H, Hasegawa D, Matsuda O. Prediction of left atrial appendage thrombi in non-valvular atrial fibrillation. *Eur Heart J* 2007;**28**:2217–2222.
99. Ohara K, Inoue H, Nozawa T, Hirai T, Iwasa A, Okumura K, Lee JD, Shimizu A, Hayano M, Yano K. Accumulation of risk factors enhances the prothrombotic state in atrial fibrillation. *Int J Cardiol* 2008;**126**:316–321.
100. Somloi M, Tomcsanyi J, Nagy E, Bodo I, Bezzegh A. D-dimer determination as a screening tool to exclude atrial thrombi in atrial fibrillation. *Am J Cardiol* 2003;**92**:85–87.
101. Sadanaga T, Sadanaga M, Ogawa S. Evidence that D-dimer levels predict subsequent thromboembolic and cardiovascular events in patients with atrial fibrillation during oral anticoagulant therapy. *J Am Coll Cardiol* 2010;**55**:2225–2231.
102. Vene N, Mavri A, Kosmelj K, Stegnar M. High D-dimer levels predict cardiovascular events in patients with chronic atrial fibrillation during oral anticoagulant therapy. *Thromb Haemost* 2003;**90**:1163–1172.
103. Eikelboom J, Hijazi Z, Oldgren J, Andersson U, Connolly SJ, Ezekowitz MD, Reilly PA, Yusuf S, Wallentin L, Siegbahn A. D-dimer is Prognostic for Stroke, Major Bleeding and Death During Anticoagulation of Atrial Fibrillation - a RELY Substudy. *Circulation* 2010;**122**:A18321.
104. Christersson C, Schollin M, Alexander JH, Bersh BJ, Horowitz J, Hylek EM, Mohan P, Granger CB, Wallentin L, Siegbahn A. Increased levels of D-dimer in atrial fibrillation identify patients with higher risk of thromboembolic events and death. *European Heart Journal* 2012;**33** (Abstract Supplement, 51, Abstract session 5297).
105. Siegbahn A, Christersson C, Schollin M, Alexander JH, Horowitz J, Hylek EM, Lopes RD, Mohan P, Granger CB, Wallentin L. Increased levels of D-dimer identify patients with atrial fibrillation at high risk for bleeding an ARISTOTLE sub-study. *European Heart Journal* 2012;**33** (Abstract Supplement 51).
106. Aviles RJ, Martin DO, Apperson-Hansen C, Houghtaling PL, Rautaharju P, Kronmal RA, Tracy RP, Van Wagener DR, Psaty BM, Lauer MS, Chung MK. Inflammation as a risk factor for atrial fibrillation. *Circulation* 2003;**108**:3006–3010.
107. Bruins P, te Velthuis H, Yazdanbakhsh AP, Jansen PG, van Hardevelt FW, de Beaumont EM, Wildevuur CR, Eijssman L, Trouwborst A, Hack CE. Activation of the complement system during and after cardiopulmonary bypass surgery: postsurgery activation involves C-reactive protein and is associated with post-operative arrhythmia. *Circulation* 1997;**96**:3542–3548.
108. Chung MK, Martin DO, Sprecher D, Wazni O, Kanderian A, Carnes CA, Bauer JA, Tchou PJ, Niebauer MJ, Natale A, Van Wagener DR. C-reactive protein elevation in patients with atrial arrhythmias: inflammatory mechanisms and persistence of atrial fibrillation. *Circulation* 2001;**104**:2886–2891.
109. Frustaci A, Caldarulo M, Buffon A, Bellocchi F, Fenici R, Melina D. Cardiac biopsy in patients with 'primary' atrial fibrillation. Histologic evidence of occult myocardial diseases. *Chest* 1991;**100**:303–306.
110. Fichtlscherer S, Zeiher AM. Endothelial dysfunction in acute coronary syndromes: association with elevated C-reactive protein levels. *Ann Med* 2000;**32**:515–518.
111. Kishimoto T. Interleukin-6: discovery of a pleiotropic cytokine. *Arthritis Res Ther* 2006;**8**(Suppl 2):S2.
112. Libby P, Ridker PM. Novel inflammatory markers of coronary risk: theory versus practice. *Circulation* 1999;**100**:1148–1150.
113. Blake GJ, Ridker PM. C-reactive protein and other inflammatory risk markers in acute coronary syndromes. *J Am Coll Cardiol* 2003;**41**(4 Suppl S):375–425.
114. Boos CJ, Anderson RA, Lip GY. Is atrial fibrillation an inflammatory disorder? *Eur Heart J* 2006;**27**:136–149.
115. Casaclang-Verzosa G, Barnes ME, Blume G, Seward JB, Gersh BJ, Cha SS, Bailey KR, Tsang TS. C-reactive protein, left atrial volume, and atrial fibrillation: a prospective study in high-risk elderly. *Echocardiography* 2010;**27**:394–399.
116. Marott SC, Nordestgaard BG, Zacho J, Friberg J, Jensen GB, Tybjaerg-Hansen A, Benn M. Does elevated C-reactive protein increase atrial fibrillation risk? A Mendelian randomization of 47,000 individuals from the general population. *J Am Coll Cardiol* 2010;**56**:789–795.
117. Schnabel RB, Larson MG, Yamamoto JF, Kathiresan S, Rong J, Levy D, Keane JF Jr, Wang TJ, Vasan RS, Benjamin EJ. Relation of multiple inflammatory biomarkers to incident atrial fibrillation. *Am J Cardiol* 2009;**104**:92–96.
118. Smith JG, Newton-Cheh C, Almgren P, Struck J, Morgenthaler NG, Bergmann A, Platonov PG, Hedblad B, Engstrom G, Wang TJ, Melander O. Assessment of conventional cardiovascular risk factors and multiple biomarkers for the prediction of incident heart failure and atrial fibrillation. *J Am Coll Cardiol* 2010;**56**:1712–1719.
119. Anderson JL, Allen Maycock CA, Lappe DL, Crandall BG, Horne BD, Bair TL, Morris SR, Li Q, Muhlestein JB. Frequency of elevation of C-reactive protein in atrial fibrillation. *Am J Cardiol* 2004;**94**:1255–1259.
120. Asselbergs FW, van den Berg MP, Diercks GF, van Gilst WH, van Veldhuisen DJ. C-reactive protein and microalbuminuria are associated with atrial fibrillation. *Int J Cardiol* 2005;**98**:73–77.
121. Conway DS, Buggins P, Hughes E, Lip GY. Relationship of interleukin-6 and C-reactive protein to the prothrombotic state in chronic atrial fibrillation. *J Am Coll Cardiol* 2004;**43**:2075–2082.
122. Crandall MA, Horne BD, Day JD, Anderson JL, Muhlestein JB, Crandall BG, Weiss JP, Lappe DL, Bunch TJ. Atrial fibrillation and CHADS2 risk factors are associated with highly sensitive C-reactive protein incrementally and independently. *Pacing Clin Electrophysiol* 2009;**32**:648–652.
123. Roldan V, Marin F, Martinez JG, Garcia-Herola A, Sogorb F, Lip GY. Relation of interleukin-6 levels and prothrombin fragment 1+2 to a point-based score for stroke risk in atrial fibrillation. *Am J Cardiol* 2005;**95**:881–882.
124. Acevedo M, Corbalan R, Braun S, Pereira J, Gonzalez I, Navarrete C. Biochemical predictors of cardiac rhythm at 1 year follow-up in patients with non-valvular atrial fibrillation. *J Thromb Thrombolysis* 2012.
125. Korantzopoulos P, Kalantzi K, Siogas K, Goudevenos JA. Long-term prognostic value of baseline C-reactive protein in predicting recurrence of atrial fibrillation after electrical cardioversion. *Pacing Clin Electrophysiol* 2008;**31**:1272–1276.
126. Smit MD, Maass AH, De Jong AM, Muller Kobold AC, Van Veldhuisen DJ, Van Gelder IC. Role of inflammation in early atrial fibrillation recurrence. *Europace* 2012;**14**:810–817.
127. Watanabe E, Arakawa T, Uchiyama T, Kodama I, Hishida H. High-sensitivity C-reactive protein is predictive of successful cardioversion for atrial fibrillation and maintenance of sinus rhythm after conversion. *Int J Cardiol* 2006;**108**:346–353.
128. Dernelis J, Panaretou M. Relationship between C-reactive protein concentrations during glucocorticoid therapy and recurrent atrial fibrillation. *Eur Heart J* 2004;**25**:1100–1107.
129. Loricchio ML, Cianfrocca C, Pasceri V, Bianconi L, Auriti A, Calo L, Lamberti F, Castro A, Pandozi C, Palamara A, Santini M. Relation of C-reactive protein to long-term risk of recurrence of atrial fibrillation after electrical cardioversion. *Am J Cardiol* 2007;**99**:1421–1424.
130. Conway DS, Buggins P, Hughes E, Lip GY. Predictive value of indexes of inflammation and hypercoagulability on success of cardioversion of persistent atrial fibrillation. *Am J Cardiol* 2004;**94**:508–510.
131. Malouf JF, Kanagala R, Al Atawi FO, Rosales AG, Davison DE, Murali NS, Tsang TS, Chandrasekaran K, Ammass NM, Friedman PA, Somers VK. High sensitivity C-reactive protein: a novel predictor for recurrence of atrial fibrillation after successful cardioversion. *J Am Coll Cardiol* 2005;**46**:1284–1287.
132. Conway DS, Buggins P, Hughes E, Lip GY. Prognostic significance of raised plasma levels of interleukin-6 and C-reactive protein in atrial fibrillation. *Am Heart J* 2004;**148**:462–466.
133. Lip GY, Patel JV, Hughes E, Hart RG. High-sensitivity C-reactive protein and soluble CD40 ligand as indices of inflammation and platelet activation in 880 patients with nonvalvular atrial fibrillation: relationship to stroke risk factors, stroke risk stratification schema, and prognosis. *Stroke* 2007;**38**:1229–1237.
134. Hermida J, Lopez FL, Montes R, Matsushita K, Astor BC, Alonso A. Usefulness of high-sensitivity C-reactive protein to predict mortality in patients with atrial fibrillation (from the Atherosclerosis Risk In Communities [ARIC] Study). *Am J Cardiol* 2012;**109**:95–99.
135. Aulin JK, Andersson U, Connolly SJ, Huber K, Reilly PA, Siegbahn A, Wallentin L, Yusuf S, Oldgren J. Interleukin-6 and C-reactive protein and risk for death and cardiovascular events in patients with atrial fibrillation. *J Am Coll Cardiol* 2011;**57**:E91.
136. Conway DS, Buggins P, Hughes E, Lip GY. Relation of interleukin-6, C-reactive protein, and the prothrombotic state to transesophageal echocardiographic findings in atrial fibrillation. *Am J Cardiol* 2004;**93**:1368–73, A6.

137. Issac TT, Dokainish H, Lakkis NM. Role of inflammation in initiation and perpetuation of atrial fibrillation: a systematic review of the published data. *J Am Coll Cardiol* 2007;**50**:2021–2028.
138. Psychari SN, Apostolou TS, Sinos L, Hamodraka E, Liakos G, Kremastinos DT. Relation of elevated C-reactive protein and interleukin-6 levels to left atrial size and duration of episodes in patients with atrial fibrillation. *Am J Cardiol* 2005;**95**:764–767.
139. Felker GM, Hasselblad V, Hernandez AF, O'Connor CM. Biomarker-guided therapy in chronic heart failure: a meta-analysis of randomized controlled trials. *Am Heart J* 2009;**158**:422–430.
140. Januzzi JL Jr, Rehman SU, Mohammed AA, Bhardwaj A, Barajas L, Barajas J, Kim HN, Baggish AL, Weiner RB, Chen-Tournoux A, Marshall JE, Moore SA, Carlson WD, Lewis GD, Shin J, Sullivan D, Parks K, Wang TJ, Gregory SA, Uthamalingam S, Semigran MJ. Use of amino-terminal pro-B-type natriuretic peptide to guide outpatient therapy of patients with chronic left ventricular systolic dysfunction. *J Am Coll Cardiol* 2011;**58**:1881–1889.
141. Jourdain P, Jondeau G, Funck F, Gueffet P, Le Helloco A, Donal E, Aupetit JF, Aumont MC, Galinier M, Eicher JC, Cohen-Solal A, Juilliere Y. Plasma brain natriuretic peptide-guided therapy to improve outcome in heart failure: the STARS-BNP Multicenter Study. *J Am Coll Cardiol* 2007;**49**:1733–1739.
142. Aithal GP, Day CP, Kesteven PJ, Daly AK. Association of polymorphisms in the cytochrome P450 CYP2C9 with warfarin dose requirement and risk of bleeding complications. *Lancet* 1999;**353**:717–719.
143. Higashi MK, Veenstra DL, Kondo LM, Wittkowsky AK, Srinouanprachanh SL, Farin FM, Rettie AE. Association between CYP2C9 genetic variants and anticoagulation-related outcomes during warfarin therapy. *J Am Med Assoc* 2002;**287**:1690–1698.
144. Lin YJ, Tsao HM, Chang SL, Lo LW, Tuan TC, Hu YF, Udyavar AR, Tsai WC, Chang CJ, Tai CT, Lee PC, Suenari K, Huang SY, Nguyen HT, Chen SA. Prognostic implications of the high-sensitive C-reactive protein in the catheter ablation of atrial fibrillation. *Am J Cardiol* 2010;**105**:495–501.
145. Salari K, Watkins H, Ashley EA. Personalized medicine: hope or hype? *Eur Heart J* 2012;**33**:1564–1570.
